# Supplementary material for: One-step synthesis of trimetallic Pt–Pd–Ru nanodendrites as highly active electrocatalysts
Source: Royal Society of Chemistry journal article supplement (doi:10.1039/c5ra01981h), 2015-01-01
Supplement: c5ra01981h1.pdf [file c5ra01981h1.pdf]

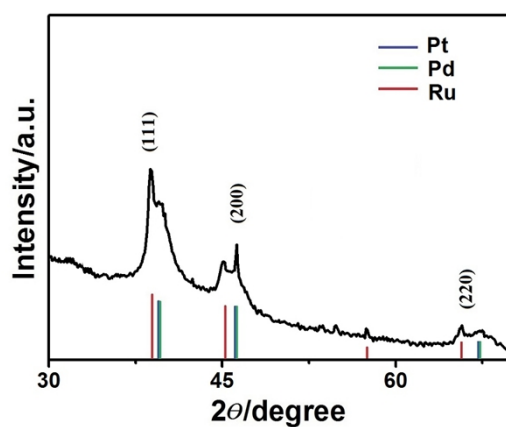

**Fig. S1** XRD pattern of the Pt-Pd-Ru nanodendrites. The positions of pure Pt, Pd and Ru at the bottom are taken from the JCPDS database.

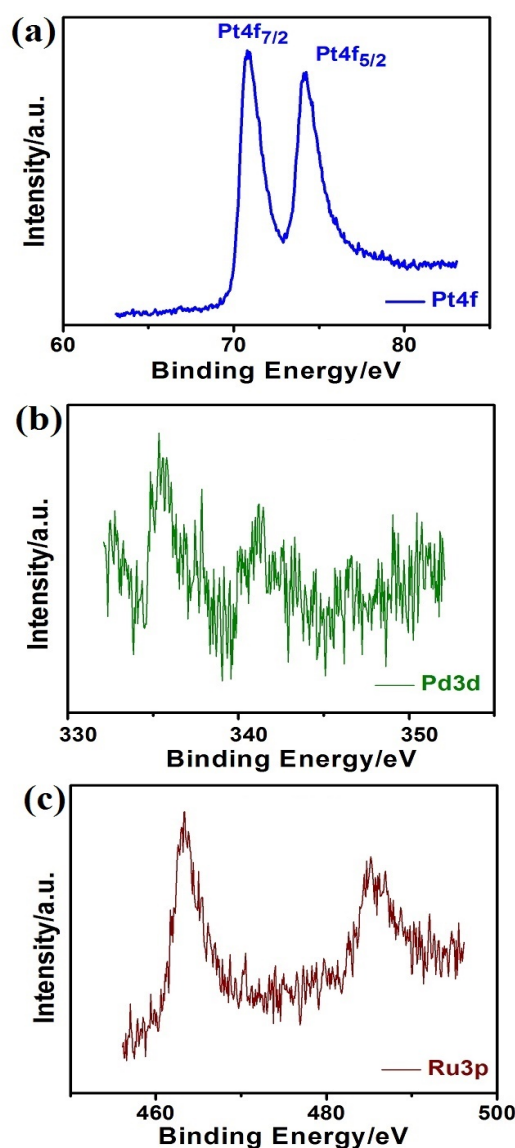

**Fig. S2** XPS spectra of the Pt-Pd-Ru nanodendrites centered on Pt 4*f* (a), Pd 3*d* (b) and Ru 3*p* (c).

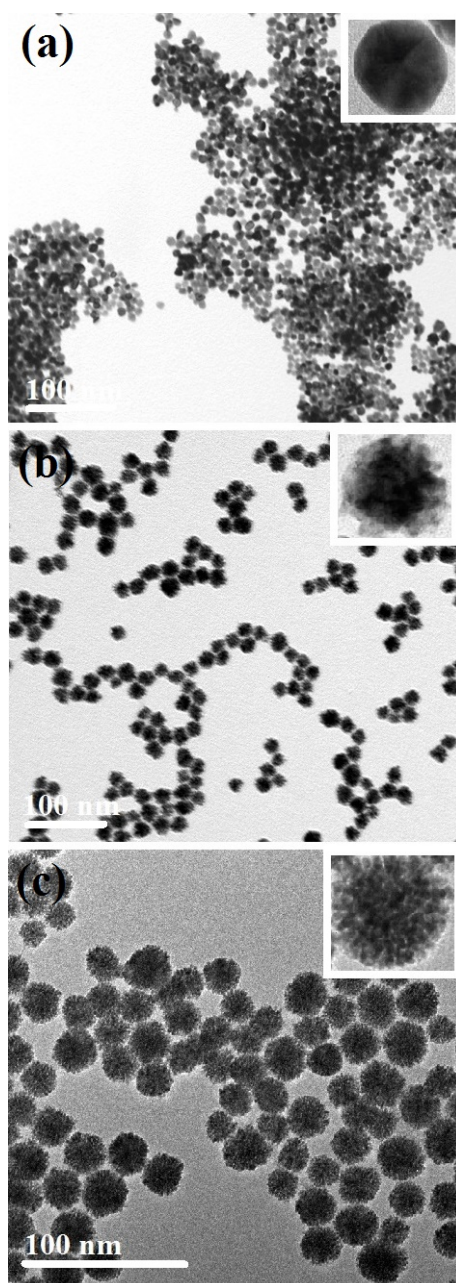

**Fig. S3** TEM images of the intermediate samples after (a) 10 seconds, (b) 5 minutes and (c) 10 minutes of reaction, respectively.

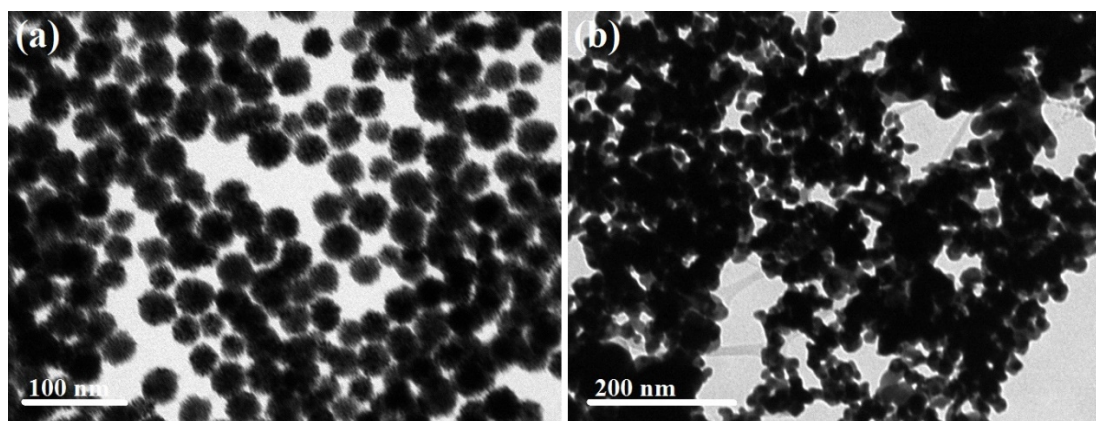

**Fig. S4** TEM images of the nanostructures produced by using (a) formic acid and (b)  $\text{NaBH}_4$  as reducing agents to replace ascorbic acid in the typical synthesis.

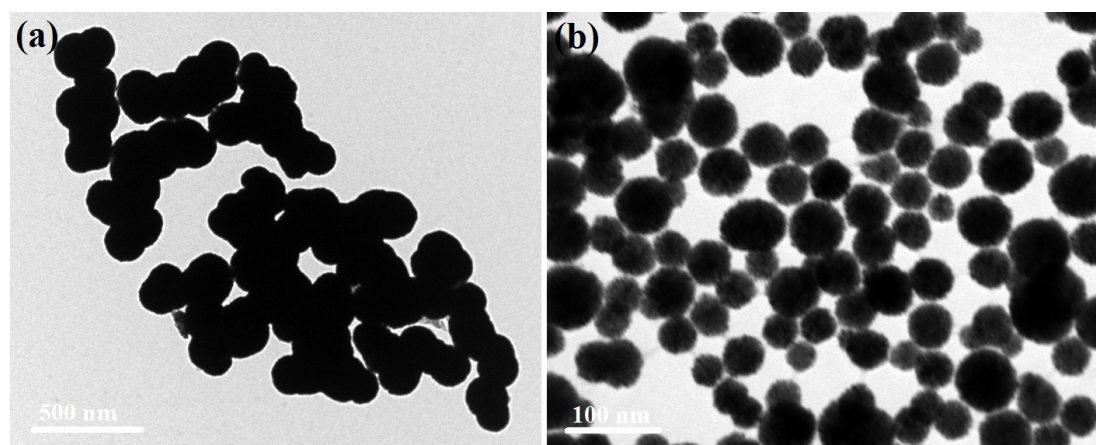

**Fig. S5** TEM images of the nanostructures synthesized by using of 0.1 M (a) and 0.2 M (b) AA, respectively, under the typical synthetic condition.

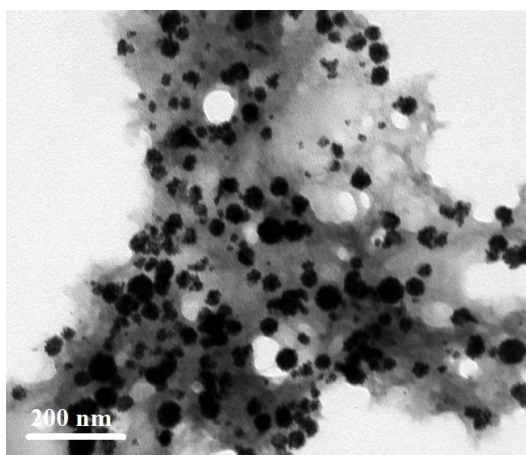

**Fig. S6** TEM images of the nanostructures produced by using CTAC as capping agents instead of Pluronic F127 in the typical synthesis.

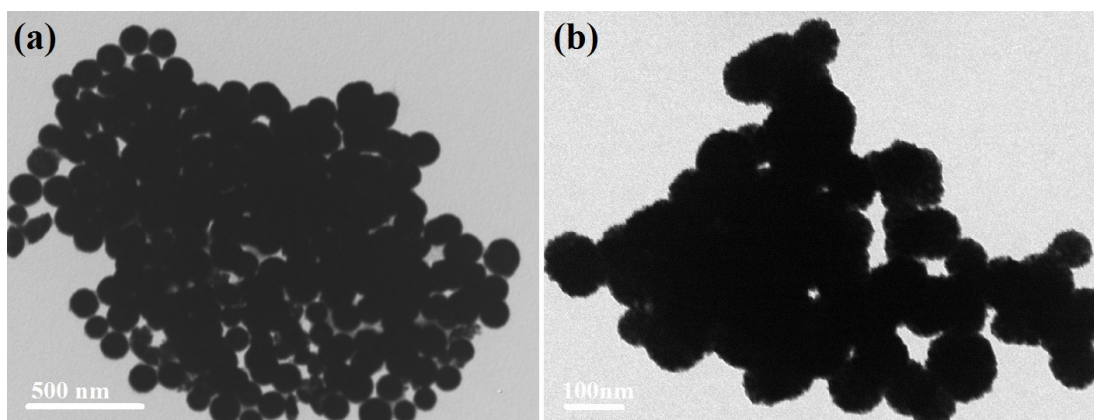

**Fig. S7** TEM images of the nanostructures synthesized without (a) and with (b) 0.001 g Pluronic F127, under the typical synthetic condition.

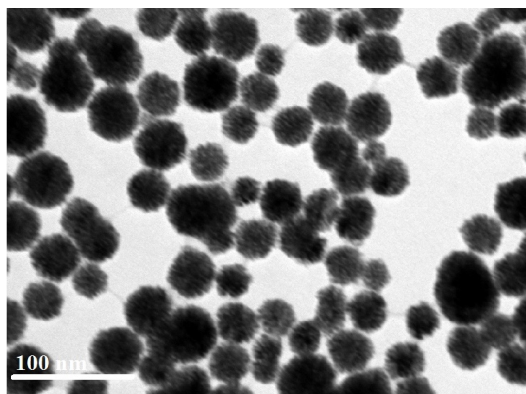

**Fig. S8** TEM image of the Pt-Pd-Ru nanodendrites prepared from 10 mM of Pt precursor.

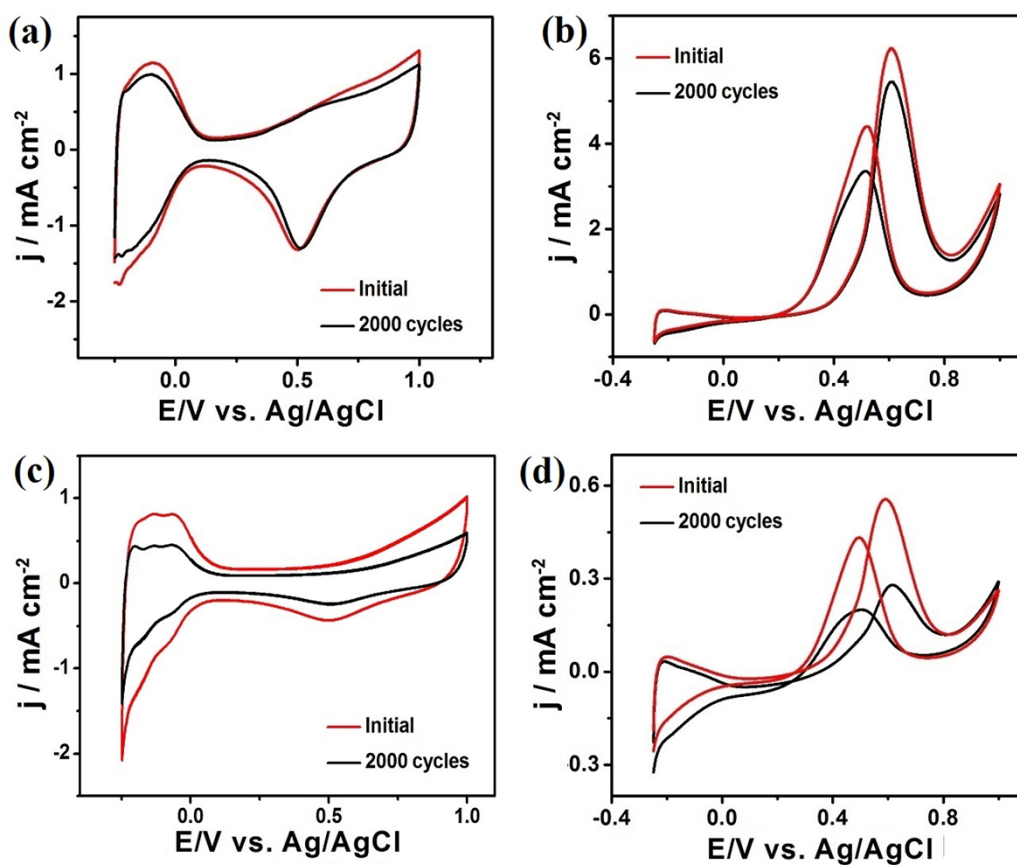

**Fig. S9** CVs for durability tests of Pt-Pd-Ru nanodendrites (a and b) and Pt/C (c and d) in 0.1 M  $\text{HClO}_4$  without (a and c) and with 1 M  $\text{CH}_3\text{OH}$  (b and d) at a scan rate of  $50 \text{ mV s}^{-1}$ . The current densities are normalized in reference to the geometric area of the working electrode.

**Table S1** The comparisons of synthetic routes, morphologies and the MOR mass activities of the Pt-Pd-Ru nanodendrites with the reported trimetallic nanoparticles.

| Catalyst                                 | Synthetic route                                                                                            | Electrolyte                                                      | Mass activity (mA $\mu\text{g}^{-1}$ ) | Ref.      |
|------------------------------------------|------------------------------------------------------------------------------------------------------------|------------------------------------------------------------------|----------------------------------------|-----------|
| <b>Pt-Pd-Ru</b><br>Nanodendrites         | One-step synthesis at room temperature (RT)                                                                | 0.1 M HClO <sub>4</sub> +<br>1 M CH <sub>3</sub> OH              | 1.82                                   | This work |
| <b>Au@PdPt</b>                           | Chemical reduction with AA/Hydrazine followed by heating to 95°C                                           | 0.1 M HClO <sub>4</sub> +<br>0.5 M CH <sub>3</sub> OH            | 1.48                                   | 1         |
| <b>Au@Cu<sub>64</sub>Pt<sub>36</sub></b> | AuNPs was synthesized at RT followed by coating with CuPt via consecutive thermal cycles between 120-200°C | 0.1 M HClO <sub>4</sub> +<br>0.1 M CH <sub>3</sub> OH            | 0.44                                   | 2         |
| <b>Au@Pd@Pt</b>                          | Chemical reduction at RT                                                                                   | 0.5 M H <sub>2</sub> SO <sub>4</sub> +<br>1 M CH <sub>3</sub> OH | 0.43                                   | 3, 4      |

**Table S2** The comparison of synthetic routes, morphologies and ORR mass activities of Pt-Pd-Ru nanodendrites with the reported trimetallic nanoparticles.

| Catalyst                                                              | Synthetic method                                                                                                 | Electrolyte             | Mass activity (mA.μg <sup>-1</sup> ) | Ref.      |
|-----------------------------------------------------------------------|------------------------------------------------------------------------------------------------------------------|-------------------------|--------------------------------------|-----------|
| <b>Pt-Pd-Ru</b><br>Nanodendrites                                      | One-step synthesis at RT                                                                                         | 0.1 M HClO <sub>4</sub> | 1.5                                  | This work |
| <b>PtPd<sub>0.85</sub>Bi<sub>0.15</sub></b><br>Nanowires              | Chemical reduction by NaBH <sub>4</sub> followed by thermal cycles between 90-200°C                              | 0.5 M HClO <sub>4</sub> | 1.16                                 | 5         |
| <b>PtPd<sub>0.85</sub>Bi<sub>0.15</sub></b><br>Nanospheres            |                                                                                                                  |                         | 0.67                                 |           |
| <b>Fe<sub>10</sub>Pt<sub>75</sub>Cu<sub>15</sub></b><br>Nanorods      | Consecutive thermal decomposition cycles till 240°C                                                              | 0.1 M HClO <sub>4</sub> | 1.034                                | 6         |
| <b>PtNiFe</b><br>Octahydrans<br>Nanowires<br>Polyhydrans<br>Nanocubes | Thermal decomposition                                                                                            | 0.1 M HClO <sub>4</sub> | 0.553<br>0.532<br>0.464<br>0.335     | 7         |
| <b>PtCu<sub>3</sub>Co</b><br>Nanospheres                              | Impregnation cu and Co precursors with commercial Pt/C followed by freeze drying then reductive annealing method | 0.1 M HClO <sub>4</sub> | 0.49                                 | 8         |
| <b>PtCu<sub>2</sub>Co<sub>2</sub></b><br>Nanospheres                  |                                                                                                                  |                         | 0.37                                 |           |
| <b>PtCuCo<sub>3</sub></b><br>Nanospheres                              |                                                                                                                  |                         | 0.37                                 |           |
| <b>CoCuPt</b><br>Nanospheres                                          | CoNPs was synthesized by reduction with NaBH <sub>4</sub> followed by coating with CuPt and annealing to 200°C   | 0.1 M HClO <sub>4</sub> | 0.15                                 | 9         |

## References

1. S. Kang, Y. Lee, Y. Park, B. Choi, J. Hong, K. Park, and S. Han, *ACS Nano*, 2013, **7**, 7945-7955.
2. X. Sun, D. Li, Y. Ding, W. Zhu, S. Guo, L. Wang, and S. Sun, *J. Am. Chem. Soc.*, 2014, **136**, 5745-5749.
3. L. Wang and Y. Yamauchi, *J. Am. Chem. Soc.*, 2010, **132**, 13636-13638.
4. L. Wang and Y. Yamauchi, *Chem. Mater.*, 2011, **23**, 2457-2465.
5. H. Liao and Y. Hou, *Chem. Mater.*, 2013, **25**, 457-465.
6. H. Zhu, S. Zhang, S. Guo, D. Su, and S. Sun, *J. Am. Chem. Soc.*, 2013, **135**, 7130-7133.
7. S. Chou, J. Shyue, C. Chien, C. Chen, Y. Chen, and P. Chou, *Chem. Mater.*, 2012, **24**, 2527-2533.
8. R. Srivastava, P. Mani, N. Hahn, and P. Strasser, *Angew. Chem. Int. Ed.*, 2007, **119**, 8988-8991.
9. J. Wu, Z. Peng, and H. Yang, *Phil. Trans. R. Soc.A.*, 2010, **368**, 426-4274.
